# Supplementary material for: Peripheral Neuropathy and Nerve Dysfunction in Individuals at High Risk for Type 2 Diabetes: The PROMISE Cohort
Source: Oxford University Press journal article supplement (doi:10.2337/dc14-2585), 2015-02-09
Supplement: dc142585supplementarydata.pdf [file dc142585supplementarydata.pdf]

SUPPLEMENTARY DATA

**Supplementary Table 1.** Association of metabolic syndrome with peripheral neuropathy and nerve dysfunction in the PROMISE cohort

|                                                    | <b>MNSI Scores**</b>         |         | <b>VPT**</b>                 |         |
|----------------------------------------------------|------------------------------|---------|------------------------------|---------|
|                                                    | Beta-coefficient<br>(95% CI) | p-value | Beta-coefficient<br>(95% CI) | p-value |
| <b>Presence vs. absence of metabolic syndrome</b>  |                              |         |                              |         |
| Unadjusted                                         | 0.082<br>(-0.16, 0.33)       | 0.5     | 0.11<br>(0.001, 0.22)        | 0.05    |
| Multivariable-adjusted*                            | 0.047<br>(-0.19, 0.29)       | 0.7     | 0.056<br>(-0.032, 0.14)      | 0.2     |
| <b>Number of metabolic disorders</b>               |                              |         |                              |         |
| Unadjusted                                         | 0.035<br>(-0.052, 0.12)      | 0.4     | 0.066<br>(0.028, 0.11)       | 0.001   |
| Multivariable-adjusted*                            | 0.0062<br>(-0.080, 0.093)    | 0.9     | 0.023<br>(-0.0086, 0.054)    | 0.2     |
| <b>Mean of the z scores of metabolic disorders</b> |                              |         |                              |         |
| Unadjusted                                         | 0.096<br>(-0.086, 0.28)      | 0.3     | 0.14<br>(0.061, 0.22)        | 0.001   |
| Multivariable-adjusted*                            | 0.032<br>(-0.15, 0.22)       | 0.7     | 0.043<br>(-0.025, 0.11)      | 0.2     |

\*Adjusted for age, sex, ethnicity and height

\*\* MNSI scores (with a total score of 10) and VPTs were modelled as continuous variables
